# Supplementary material for: Myocarditis in Athletes Recovering from COVID-19: A Systematic Review and Meta-Analysis
Source: MDPI journal article supplement (doi:10.3390/ijerph19074279), 2022-04-02
Supplement: s1 [file s1]

# Tables and Figures

Table S1. Research strategy.

| Database Searched | N.º | Search Words                             | Search Strategy                                                                                                                                                                                                                                                                                                                                                                                                                                                                                                                                                  | Results |
|-------------------|-----|------------------------------------------|------------------------------------------------------------------------------------------------------------------------------------------------------------------------------------------------------------------------------------------------------------------------------------------------------------------------------------------------------------------------------------------------------------------------------------------------------------------------------------------------------------------------------------------------------------------|---------|
| PubMed            | 1   | COVID-19 Myocarditis athletes            | ("COVID-19"[All Fields] OR "COVID-2019"[All Fields] OR "severe acute respiratory syndrome coronavirus 2"[Supplementary Concept] OR "severe acute respiratory syndrome coronavirus 2"[All Fields] OR "2019-nCoV"[All Fields] OR "SARS-CoV-2"[All Fields] OR "2019nCoV"[All Fields] OR ("Wuhan"[All Fields] AND ("coronavirus"[MeSH Terms] OR "coronavirus"[All Fields])) AND (2019/12[PDAT] OR 2020[PDAT])) AND ("myocarditis"[MeSH Terms] OR "athletes"[All Fields])                                                                                             | 52      |
| PubMed            | 2   | Sars-CoV-2 Myocarditis athletes          | ("COVID-19"[All Fields] OR "COVID-2019"[All Fields] OR "severe acute respiratory syndrome coronavirus 2"[Supplementary Concept] OR "severe acute respiratory syndrome coronavirus 2"[All Fields] OR "2019-nCoV"[All Fields] OR "SARS-CoV-2"[All Fields] OR "2019nCoV"[All Fields] OR ("Wuhan"[All Fields] AND ("coronavirus"[MeSH Terms] OR "coronavirus"[All Fields])) AND (2019/12[PDAT] OR 2020[PDAT])) AND ("myocarditis"[MeSH Terms] OR "athletes"[All Fields])                                                                                             | 38      |
| PubMed            | 3   | COVID-19 CMR athletes                    | ("COVID-19"[All Fields] OR "COVID-2019"[All Fields] OR "severe acute respiratory syndrome coronavirus 2"[Supplementary Concept] OR "severe acute respiratory syndrome coronavirus 2"[All Fields] OR "2019-nCoV"[All Fields] OR "SARS-CoV-2"[All Fields] OR "2019nCoV"[All Fields] OR ("Wuhan"[All Fields] AND ("coronavirus"[MeSH Terms] OR "coronavirus"[All Fields])) AND (2019/12[PDAT] OR 2020[PDAT])) AND ("CMR"[MeSH Terms] OR "CMR"[All Fields] OR "athletes"[All Fields])                                                                                | 17      |
| PubMed            | 4   | Sars-CoV-2 CMR athletes                  | ("COVID-19"[All Fields] OR "COVID-2019"[All Fields] OR "severe acute respiratory syndrome coronavirus 2"[Supplementary Concept] OR "severe acute respiratory syndrome coronavirus 2"[All Fields] OR "2019-nCoV"[All Fields] OR "SARS-CoV-2"[All Fields] OR "2019nCoV"[All Fields] OR ("Wuhan"[All Fields] AND ("coronavirus"[MeSH Terms] OR "coronavirus"[All Fields])) AND (2019/12[PDAT] OR 2020[PDAT])) AND ("CMR"[MeSH Terms] OR "CMR"[All Fields] OR "athletes"[All Fields])                                                                                | 14      |
| PubMed            | 5   | COVID-19 Pericardial effusion athletes   | ("COVID-19"[All Fields] OR "COVID-2019"[All Fields] OR "severe acute respiratory syndrome coronavirus 2"[Supplementary Concept] OR "severe acute respiratory syndrome coronavirus 2"[All Fields] OR "2019-nCoV"[All Fields] OR "SARS-CoV-2"[All Fields] OR "2019nCoV"[All Fields] OR ("Wuhan"[All Fields] AND ("coronavirus"[MeSH Terms] OR "coronavirus"[All Fields])) AND (2019/12[PDAT] OR 2020[PDAT])) AND ("pericardial effusion"[MeSH Terms] OR "athletes"[All Fields] AND "athletes"[All Fields]) OR "pericardial"[All Fields] OR "athletes"[All Fields]) | 4       |
| PubMed            | 6   | Sars-CoV-2 Pericardial effusion athletes | ("COVID-19"[All Fields] OR "COVID-2019"[All Fields] OR "severe acute respiratory syndrome coronavirus 2"[Supplementary Concept] OR "severe acute respiratory syndrome coronavirus 2"[All Fields] OR "2019-nCoV"[All Fields] OR "SARS-CoV-2"[All Fields] OR "2019nCoV"[All Fields] OR ("Wuhan"[All Fields] AND ("coronavirus"[MeSH Terms] OR "coronavirus"[All Fields])) AND (2019/12[PDAT] OR 2020[PDAT])) AND ("pericardial effusion"[MeSH Terms] OR "athletes"[All Fields] AND "athletes"[All Fields]) OR "pericardial"[All Fields] OR "athletes"[All Fields]) | 4       |
| PubMed            | 6   |                                          | Results                                                                                                                                                                                                                                                                                                                                                                                                                                                                                                                                                          | 129     |
| SCOPUS            | 1   | COVID-19 Myocarditis athletes            | (Covid 19 myocarditis AND athletes)                                                                                                                                                                                                                                                                                                                                                                                                                                                                                                                              | 54      |
| SCOPUS            | 2   | Sars-CoV-2 Myocarditis athletes          | (Sars-Cov-2 AND myocarditis AND athletes)                                                                                                                                                                                                                                                                                                                                                                                                                                                                                                                        | 24      |
| SCOPUS            | 2   |                                          | Results                                                                                                                                                                                                                                                                                                                                                                                                                                                                                                                                                          | 78      |
| Web of Science    | 1   | COVID-19 Myocarditis athletes            | (Covid 19 myocarditis athletes)                                                                                                                                                                                                                                                                                                                                                                                                                                                                                                                                  | 35      |
| Web of Science    | 2   | Sars-CoV-2 Myocarditis athletes          | (Sars-Cov-2 myocarditis athletes)                                                                                                                                                                                                                                                                                                                                                                                                                                                                                                                                | 11      |
| Web of Science    | 2   |                                          | Results                                                                                                                                                                                                                                                                                                                                                                                                                                                                                                                                                          | 46      |
| Total             |     |                                          | Results                                                                                                                                                                                                                                                                                                                                                                                                                                                                                                                                                          | 253     |

Table S2. Critical appraisal included cohort studies

|                                                                                                                               | Clark<br>et al.<br>(2021) | Cavigli<br>et al.<br>(2021) | Cavigli<br>et al.<br>(2021) | Daniels<br>et al.<br>(2021) | Hendrickson<br>et al.<br>(2021) | Malek<br>et al.<br>(2021) | Moulson<br>et al.<br>(2021) | Guevarra<br>et al.<br>(2022) | Vago<br>et al.<br>(2020) | Mascia<br>et al.<br>(2020) |
|-------------------------------------------------------------------------------------------------------------------------------|---------------------------|-----------------------------|-----------------------------|-----------------------------|---------------------------------|---------------------------|-----------------------------|------------------------------|--------------------------|----------------------------|
| 1 Similar groups                                                                                                              | +                         | -                           | -                           | -                           | -                               | -                         | -                           | -                            | +                        | +                          |
| 2 Exposures similar<br>in different groups                                                                                    | -                         | -                           | -                           | -                           | -                               | -                         | -                           | -                            | -                        | -                          |
| 3 Exposures<br>validly measured                                                                                               | +                         | -                           | -                           | +                           | +                               | +                         | +                           | +                            | +                        | -                          |
| 4 Identification<br>confounding<br>factors                                                                                    | -                         | -                           | -                           | -                           | -                               | -                         | -                           | -                            | -                        | -                          |
| 5 Strategies<br>confounding<br>factors                                                                                        | -                         | -                           | -                           | -                           | -                               | -                         | -                           | -                            | -                        | -                          |
| 6 Participants free<br>of<br>outcome at the<br>start                                                                          | -                         | -                           | -                           | -                           | -                               | -                         | -                           | -                            | -                        | -                          |
| 7 Outcomes validly<br>measured                                                                                                | -                         | +                           | +                           | +                           | +                               | +                         | +                           | +                            | +                        | +                          |
| 8 Follow-up long<br>enough                                                                                                    | -                         | -                           | -                           | +                           | -                               | -                         | +                           | -                            | -                        | -                          |
| 9 Follow-up<br>complete or<br>reasons described                                                                               | -                         | -                           | -                           | -                           | -                               | -                         | +                           | -                            | -                        | -                          |
| 10 Strategies<br>incomplete follow-<br>up<br>utilized                                                                         | -                         | -                           | -                           | -                           | -                               | -                         | -                           | -                            | -                        | -                          |
| 11 Appropriate<br>statistical analysis                                                                                        | +                         | +                           | +                           | +                           | +                               | +                         | +                           | +                            | +                        | +                          |
| Total yes answers:                                                                                                            | 3                         | 2                           | 2                           | 4                           | 3                               | 3                         | 5                           | 3                            | 4                        | 3                          |
| ('+' = yes, '-' = no, and ' ' = not applicable) according to the Joanna Briggs Institute Critical Appraisal tools checklists. |                           |                             |                             |                             |                                 |                           |                             |                              |                          |                            |

Table S3. Critical appraisal included Case control studies

|                                                                                                                               | Gervasi et<br>al.<br>(2020) |
|-------------------------------------------------------------------------------------------------------------------------------|-----------------------------|
| 1 Comparable group                                                                                                            | +                           |
| 2 Cases and controls matched                                                                                                  | +                           |
| 3 Same criteria used for identification                                                                                       | +                           |
| 4 Exposure measured in a standard, valid way                                                                                  | +                           |
| 5 Exposure measured in the same way for both<br>groups                                                                        | +                           |
| 6 Confounding factors                                                                                                         | -                           |
| 7 Strategies deal with confounding factors                                                                                    | -                           |
| 8 Outcomes validly measured                                                                                                   | +                           |
| 9 Exposure period long enough                                                                                                 | +                           |
| 10 Appropriate statistical analysis Total yes<br>answers:                                                                     | 8                           |
| ('+' = yes, '-' = no, and ' ' = not applicable) according to the Joanna Briggs Institute Critical Appraisal tools checklists. |                             |

Table S4. Critical appraisal included Cross sectional studies

|                                                                                                                               | Brito et al.<br>(2020) | Martinez et al.<br>(2021) | Liliána Szabó et al.<br>(2021) |
|-------------------------------------------------------------------------------------------------------------------------------|------------------------|---------------------------|--------------------------------|
| 1 Inclusion criteria clearly defined                                                                                          | -                      | -                         | -                              |
| 2 Study subjects and setting described in detail                                                                              | -                      | -                         | +                              |
| 3 Exposure measured in a standard, valid way                                                                                  | +                      | +                         | +                              |
| 4 Objective, standard criteria used for measurement of the condition?                                                         | -                      | +                         | +                              |
| 5 Confounding factors                                                                                                         | -                      | -                         | -                              |
| 6 Strategies deal with confounding factors                                                                                    | -                      | -                         | -                              |
| 7 Outcomes validly measured                                                                                                   | -                      | +                         | +                              |
| 8 Appropriate statistical analysis                                                                                            | +                      | -                         | +                              |
| Total yes answers:                                                                                                            | 2                      | 3                         | 5                              |
| ('+' = yes, '-' = no, and ' ' = not applicable) according to the Joanna Briggs Institute Critical Appraisal tools checklists. |                        |                           |                                |

Table S5. Critical appraisal included case series

|                                                                                                                               | Starekova et al.<br>(2021) |
|-------------------------------------------------------------------------------------------------------------------------------|----------------------------|
| 1 Inclusion criteria clearly defined                                                                                          | -                          |
| 2 Condition measured in a standard, valid way                                                                                 | +                          |
| 3 Valid methods used for identification of the condition                                                                      | -                          |
| 4 Consecutive inclusion                                                                                                       | +                          |
| 5 Complete inclusion                                                                                                          | +                          |
| 6 Clear reporting of demographics                                                                                             | +                          |
| 7 Clear reporting of clinical information                                                                                     | -                          |
| 8 Outcomes clearly reported                                                                                                   | +                          |
| 9 Clear reporting of presenting clinic demographic information                                                                | -                          |
| 10 Appropriate statistical analysis                                                                                           | +                          |
| Total yes answers:                                                                                                            | 6                          |
| ('+' = yes, '-' = no, and ' ' = not applicable) according to the Joanna Briggs Institute Critical Appraisal tools checklists. |                            |

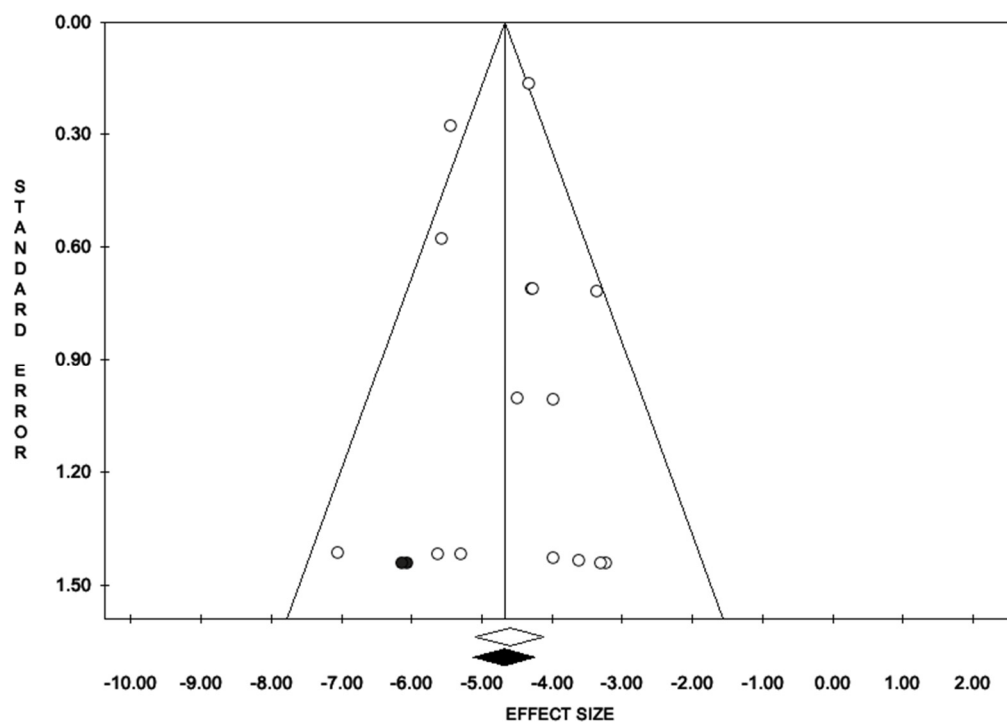

**Figure S1:** Funnel plot showing publication bias on myocarditis in total sample of athletes (n° 7988) who recovered from COVID-19 infection. Egger's linear regress test was not significant (p-value 0.98)

Tables and Figures legend

TAB. s1 Research strategy

TAB. s2-5 Full Quality Assestement JBI

FIG. s1 Funnel plot showing publication bias on myocarditis in total sample of athletes (n° 7988) who recovered from COVID-19 infection. Egger's linear regress test was not significant (p-value 0.98)
